# Supplementary material for: pH-sensitive peptide hydrogel encapsulating the anti-angiogenesis drug conbercept and chemotherapeutic drug dox as a combination therapy for retinoblastoma
Source: Royal Society of Chemistry journal article supplement (doi:10.1039/d3ma01028g), 2024-01-01
Supplement: d3ma01028g1.pdf [file d3ma01028g1.pdf]

1           **pH Sensitive Peptide Hydrogel Encapsulating Anti-**  
2           **angiogenesis Drug Conbercept and Chemotherapy Drug**  
3           **DOX for the Combined Treatment of Retinoblastoma**

4  
5           Wen Fan<sup>1</sup>, Mingkang Chen<sup>1</sup>, Faisal Raza<sup>2</sup>, Hajra Zafar<sup>2</sup>, Faryal Jahan<sup>3</sup>, Yuejian  
6                           Chen<sup>4</sup>, Lexin Ge<sup>1</sup>, Minyan Yang<sup>5,\*</sup> and Yiqun Wu<sup>6,\*</sup>

7  
8           <sup>1</sup>Department of Ophthalmology, The First Affiliated Hospital of Nanjing Medical  
9           University, Nanjing, 210029, China

10          <sup>2</sup>School of Pharmacy, Shanghai Jiao Tong University, Shanghai 200240, China

11          <sup>3</sup>Shifa Tameer-e-Millat University Islamabad, Pakistan

12          <sup>4</sup>Nanjing iChemBridge Pharmaceutical Technology Co. , Ltd

13          <sup>5</sup>The Affiliated Taizhou People's Hospital of Nanjing Medical University, Taizhou,  
14          225300, China.

15          <sup>6</sup>School of Pharmacy, China Pharmaceutical University, Nanjing, 211100, China

16

17          **Correspondence:**

18          **Yiqun Wu**

19          School of Pharmacy, China Pharmaceutical University, Nanjing, 211100, China

20          Tel:15951715266.

21          E-mail: WuyiqunCPU@163.com.

22

23          **Minyan Yang**

24          The Affiliated Taizhou People's Hospital of Nanjing Medical University, Taizhou,  
25          225300, China.

26          E-mail: ymyspring@163.com.

27

**A**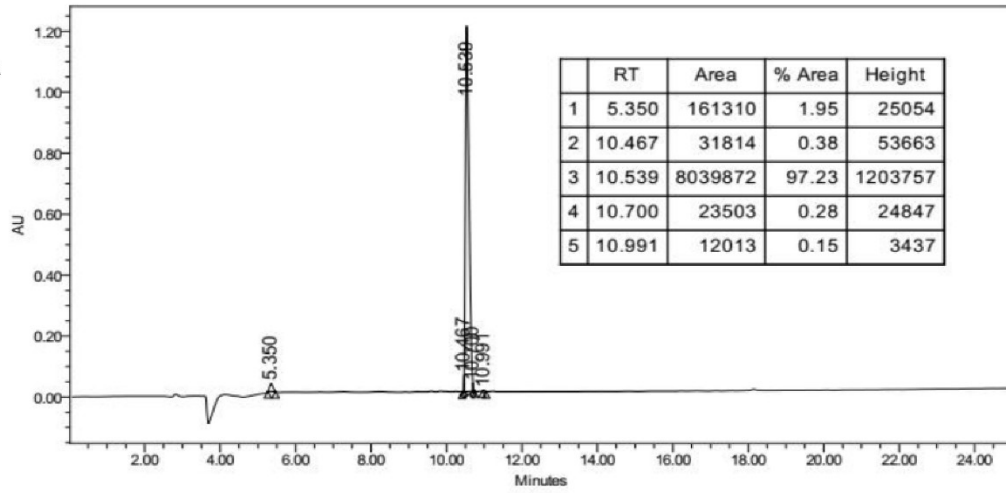**B**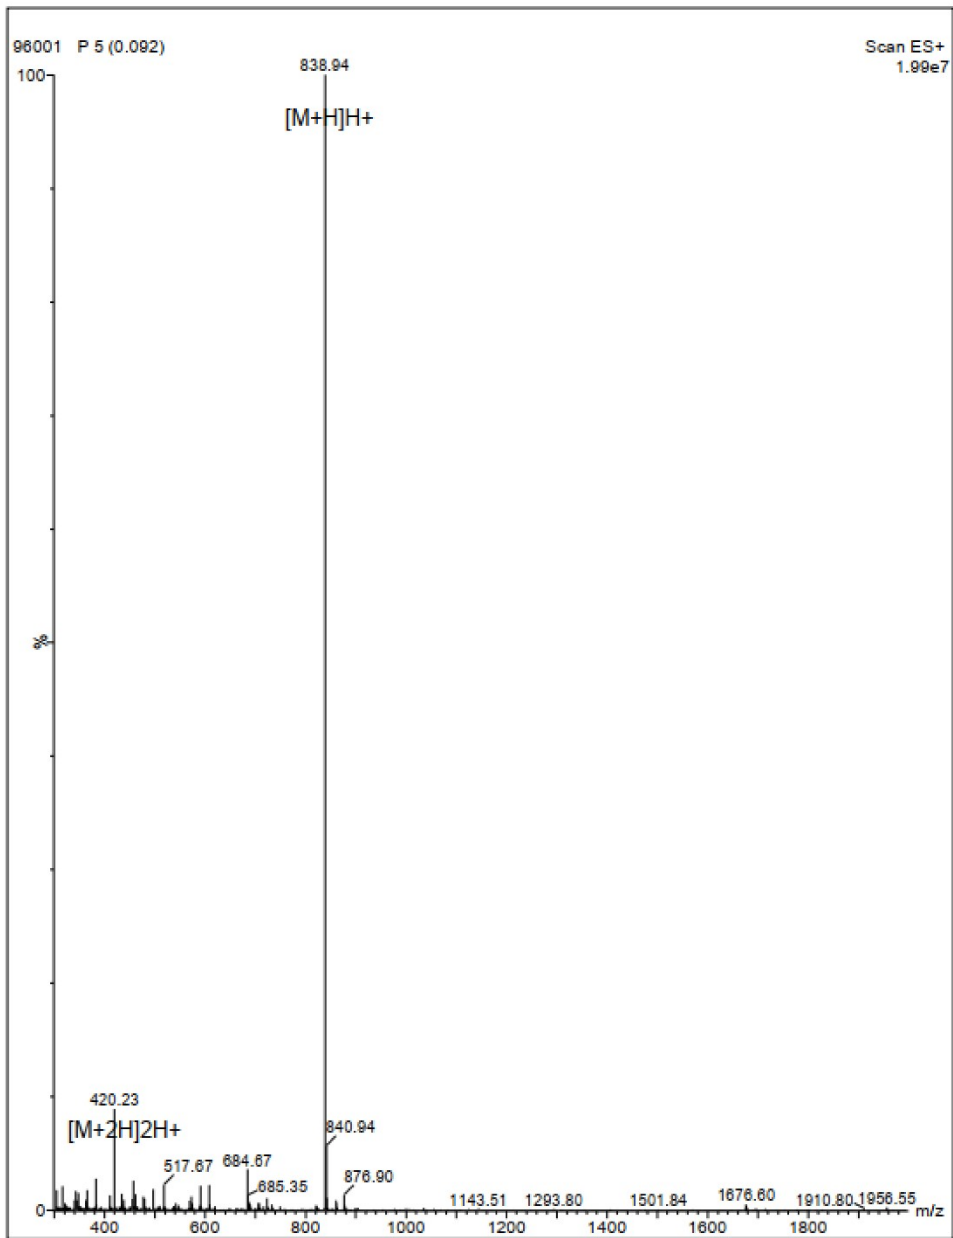

29 Fig. S1 (A) The HPLC spectrum of DDIII OH peptide. (B) The MS spectrum of  
30 DDIII OH peptide.

31

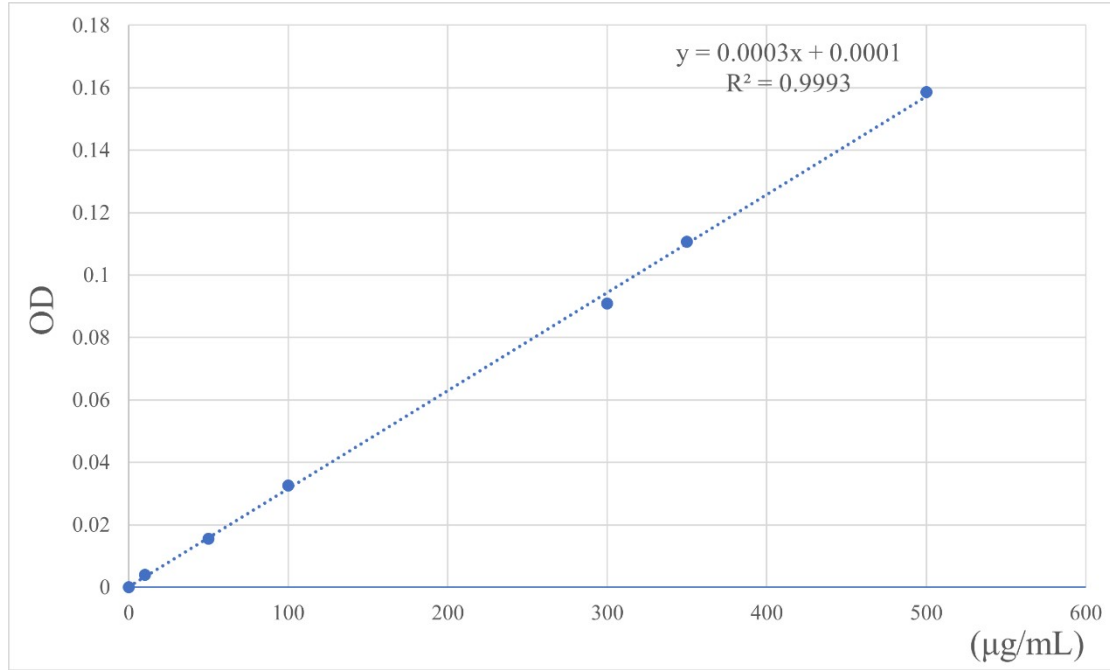

32

33

Figure. S2 Standard BCA curve.

34

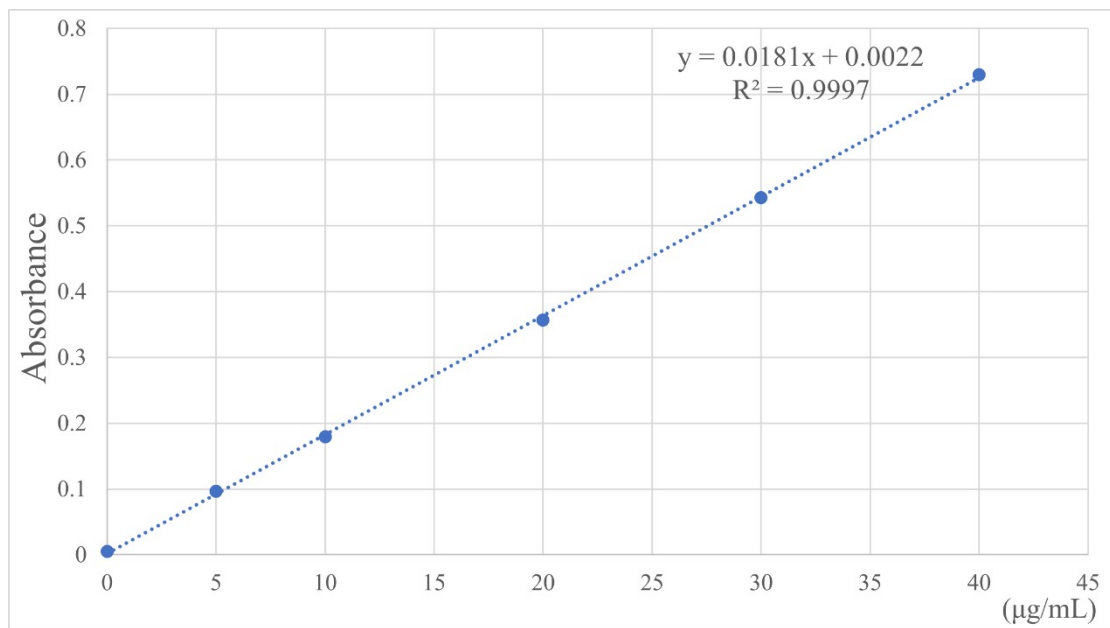

35

36

Figure. S3 Standard UV/vis curve of DOX.

37

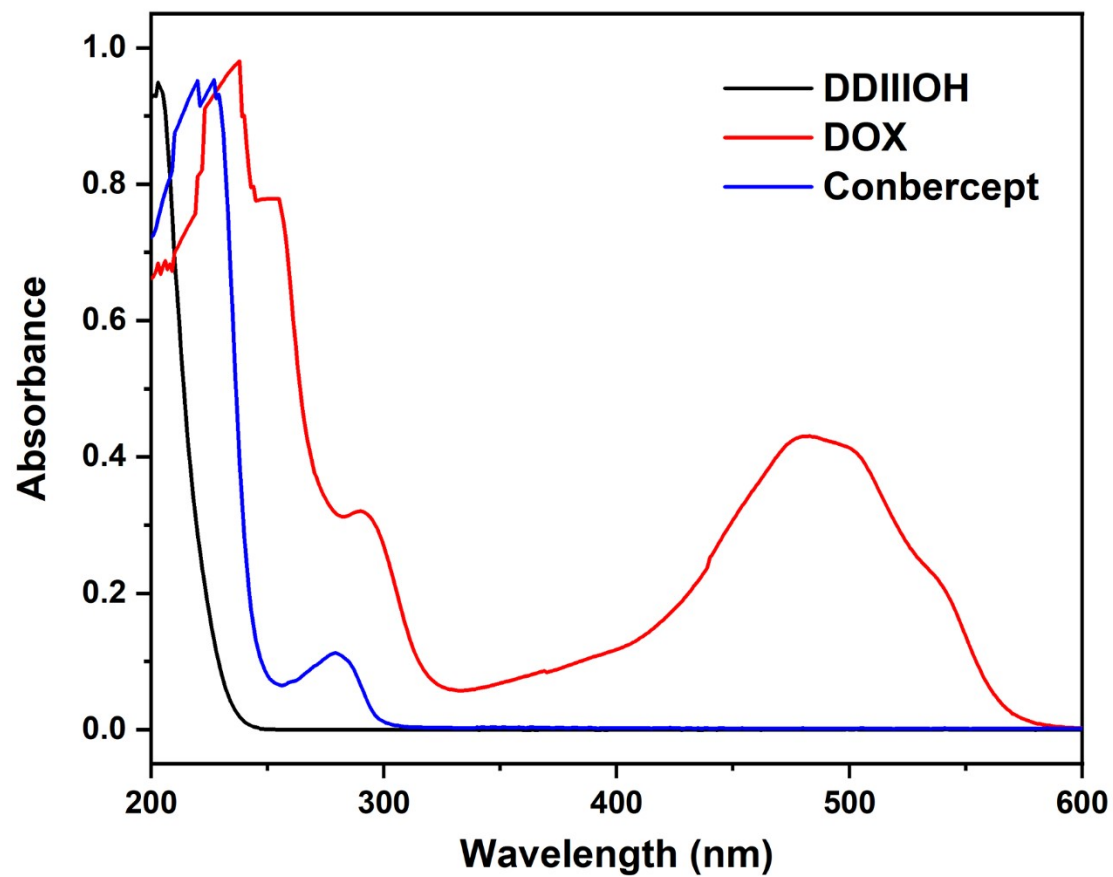

38

39

Figure. S4 UV/vis spectrum of DDIIIIOH peptide, DOX and conbercept.

40

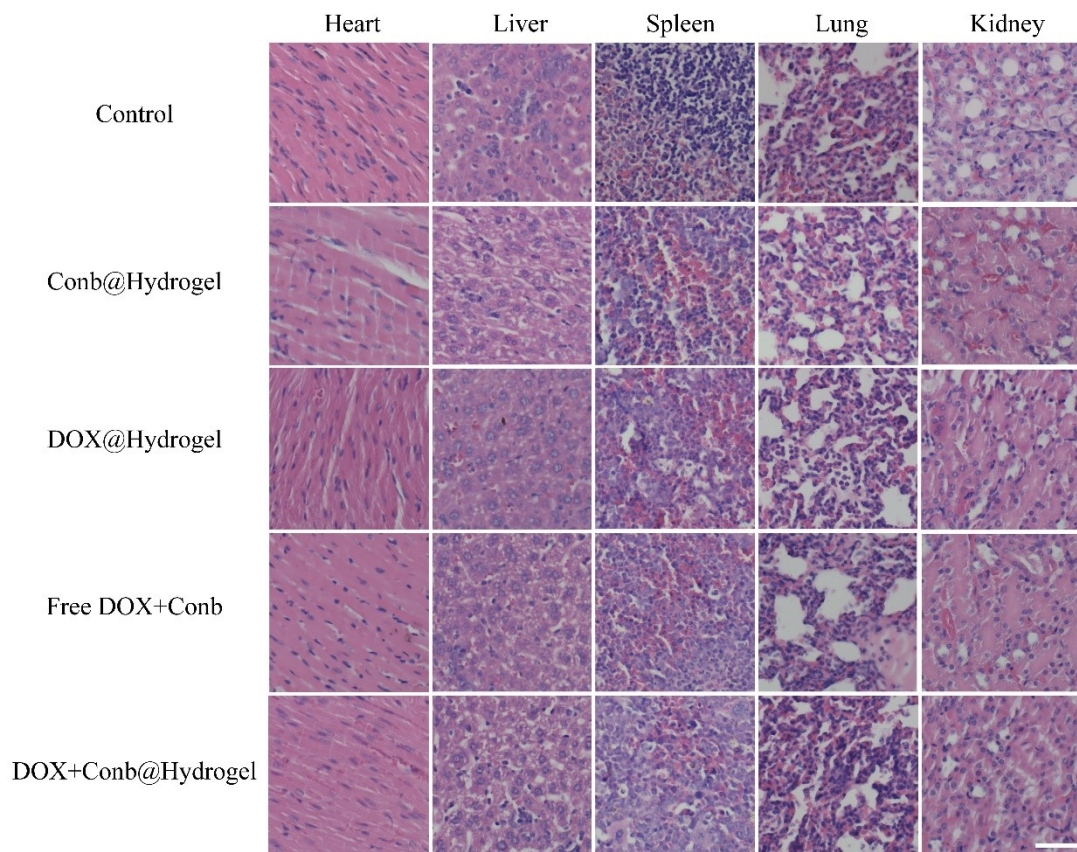

41

42 Fig. S5 H&E staining of heart, liver, spleen, lung and kidney collected from mice.

43

Scale bar was 50  $\mu$ m.

44

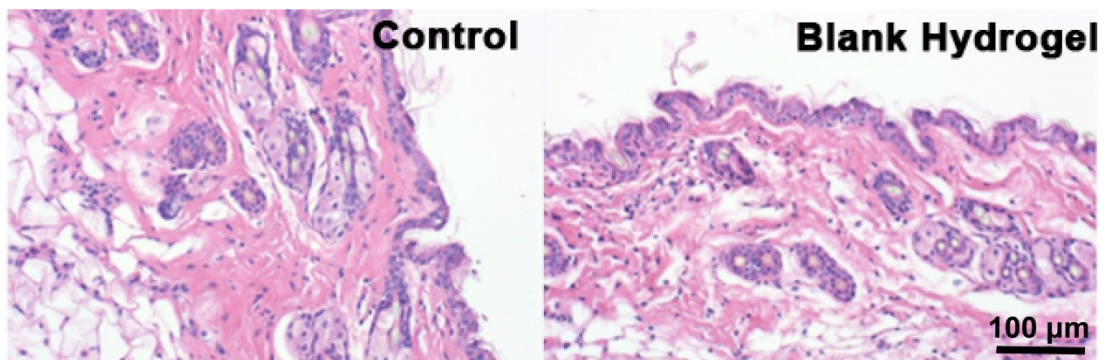

45

46 Fig. S6 H&E staining of skin tissue dissected from mouse in control group (without  
47 hydrogel administration) and mouse administrated with blank hydrogel for 10 days.

48

Scale bar: 100  $\mu$ m.
